# Supplementary material for: Risks of smoking and benefits of smoking cessation on hospitalisations for cardiovascular events and respiratory infection in patients with rheumatoid arthritis: a retrospective cohort study using the Clinical Practice Research Datalink
Source: PubMed Central journal article supplement (PMC5623338; doi:10.1136/rmdopen-2017-000506), 2017-09-26
Supplement: rmdopen-2017-000506supp001.pdf [file rmdopen-2017-000506supp001.pdf]

## Supplementary Figure S1: Definition of smoking status

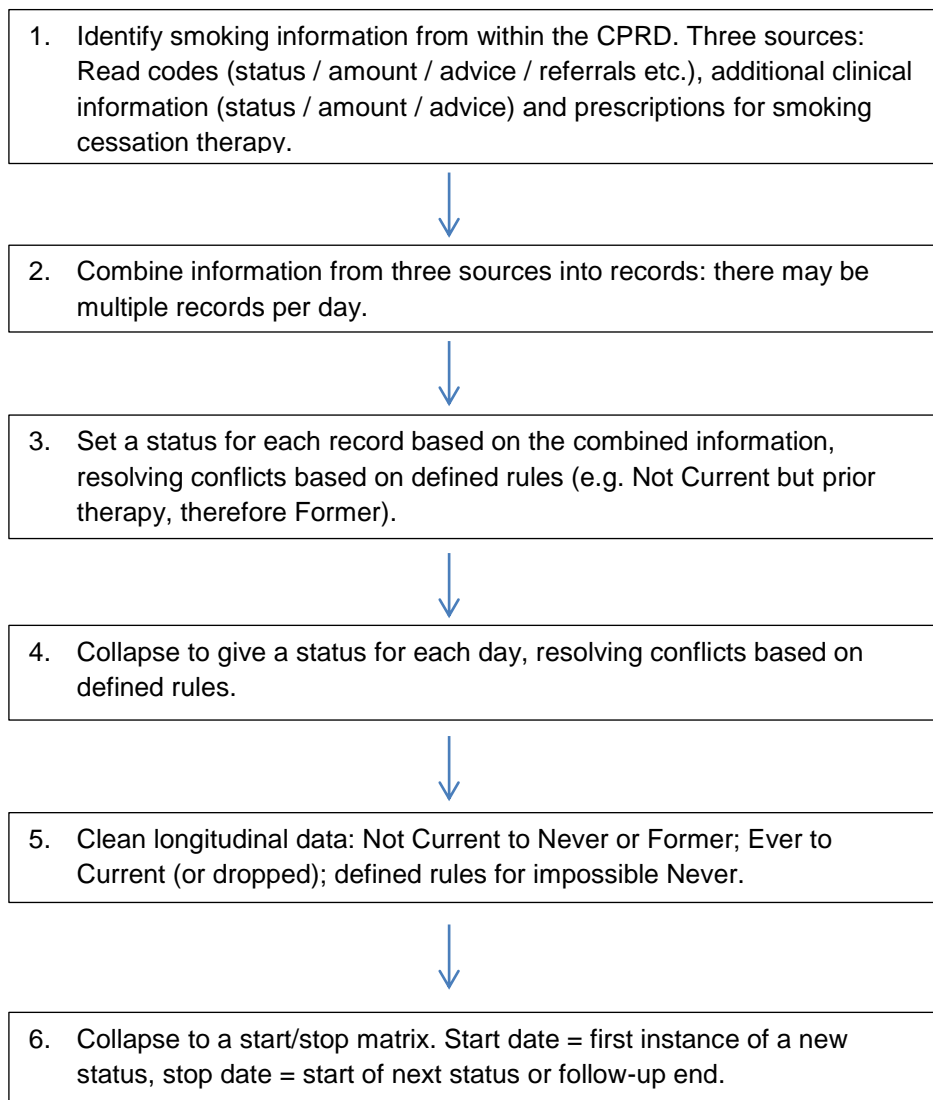

Summary of steps taken to define smoking status using data from the Clinical Practice Research Datalink.

Figure reproduced from Supplementary Figure 2 of the following paper, available under a CC-BY licence (<https://creativecommons.org/licenses/by/4.0/legalcode>):

Joseph, R. M., Movahedi, M., Dixon, W. G. and Symmons, D. P. M. (2016), Smoking-Related Mortality in Patients With Early Rheumatoid Arthritis: A Retrospective Cohort Study Using the Clinical Practice Research Datalink. *Arthritis Care & Research*, 68: 1598–1606. doi:10.1002/acr.22882

Available: <http://onlinelibrary.wiley.com/doi/10.1002/acr.22882/full> (last accessed 13 Dec 2016)
