# Supplementary material for: Risks of smoking and benefits of smoking cessation on hospitalisations for cardiovascular events and respiratory infection in patients with rheumatoid arthritis: a retrospective cohort study using the Clinical Practice Research Datalink
Source: PubMed Central journal article supplement (PMC5623338; doi:10.1136/rmdopen-2017-000506), 2017-09-26
Supplement: rmdopen-2017-000506supp002.pdf [file rmdopen-2017-000506supp002.pdf]

Supplementary Table S1 – Outcome code lists

| Type   | Outcome | Code  | Description                                                                                                   |
|--------|---------|-------|---------------------------------------------------------------------------------------------------------------|
| ICD-10 | RTI     | A15   | Respiratory tuberculosis, bacteriologically and histologically confirmed                                      |
| ICD-10 | RTI     | A15.0 | Tuberculosis of lung, confirmed by sputum microscopy with or without culture                                  |
| ICD-10 | RTI     | A15.1 | Tuberculosis of lung, confirmed by culture only                                                               |
| ICD-10 | RTI     | A15.2 | Tuberculosis of lung, confirmed histologically                                                                |
| ICD-10 | RTI     | A15.3 | Tuberculosis of lung, confirmed by unspecified means                                                          |
| ICD-10 | RTI     | A15.4 | Tuberculosis of intrathoracic lymph nodes, confirmed bacteriologically and histologically                     |
| ICD-10 | RTI     | A15.5 | Tuberculosis of larynx, trachea and bronchus, confirmed bacteriologically and histologically                  |
| ICD-10 | RTI     | A15.6 | Tuberculous pleurisy, confirmed bacteriologically and histologically                                          |
| ICD-10 | RTI     | A15.7 | Primary respiratory tuberculosis, confirmed bacteriologically and histologically                              |
| ICD-10 | RTI     | A15.8 | Other respiratory tuberculosis, confirmed bacteriologically and histologically                                |
| ICD-10 | RTI     | A15.9 | Respiratory tuberculosis unspecified, confirmed bacteriologically and histologically                          |
| ICD-10 | RTI     | A16   | Respiratory tuberculosis, not confirmed bacteriologically or histologically                                   |
| ICD-10 | RTI     | A16.0 | Tuberculosis of lung, bacteriologically and histologically negative                                           |
| ICD-10 | RTI     | A16.1 | Tuberculosis of lung, bacteriological and histological examination not done                                   |
| ICD-10 | RTI     | A16.2 | Tuberculosis of lung, without mention of bacteriological or histological confirmation                         |
| ICD-10 | RTI     | A16.3 | Tuberculosis of intrathoracic lymph nodes, without mention of bacteriological or histological confirmation    |
| ICD-10 | RTI     | A16.4 | Tuberculosis of larynx, trachea and bronchus, without mention of bacteriological or histological confirmation |
| ICD-10 | RTI     | A16.5 | Tuberculous pleurisy, without mention of bacteriological or histological confirmation                         |
| ICD-10 | RTI     | A16.7 | Primary respiratory tuberculosis without mention of bacteriological or histological confirmation              |
| ICD-10 | RTI     | A16.8 | Other respiratory tuberculosis, without mention of bacteriological or histological confirmation               |
| ICD-10 | RTI     | A16.9 | Respiratory tuberculosis unspecified, without mention of bacteriological or histological confirmation         |
| ICD-10 | RTI     | A48.1 | Legionnaires disease                                                                                          |
| ICD-10 | RTI     | J12   | Viral pneumonia, not elsewhere classified                                                                     |
| ICD-10 | RTI     | J12.0 | Adenoviral pneumonia                                                                                          |
| ICD-10 | RTI     | J12.1 | Respiratory syncytial virus pneumonia                                                                         |
| ICD-10 | RTI     | J12.2 | Parainfluenza virus pneumonia                                                                                 |
| ICD-10 | RTI     | J12.3 | Human metapneumovirus pneumonia                                                                               |
| ICD-10 | RTI     | J12.8 | Other viral pneumonia                                                                                         |
| ICD-10 | RTI     | J12.9 | Viral pneumonia, unspecified                                                                                  |
| ICD-10 | RTI     | J13   | Pneumonia due to <i>Streptococcus pneumoniae</i>                                                              |
| ICD-10 | RTI     | J14   | Pneumonia due to <i>Haemophilus influenzae</i>                                                                |
| ICD-10 | RTI     | J15   | Bacterial pneumonia, not elsewhere classified                                                                 |
| ICD-10 | RTI     | J15.0 | Pneumonia due to <i>Klebsiella pneumoniae</i>                                                                 |
| ICD-10 | RTI     | J15.1 | Pneumonia due to <i>Pseudomonas</i>                                                                           |
| ICD-10 | RTI     | J15.2 | Pneumonia due to staphylococcus                                                                               |
| ICD-10 | RTI     | J15.3 | Pneumonia due to streptococcus, group B                                                                       |

| Type   | Outcome | Code  | Description                                                                  |
|--------|---------|-------|------------------------------------------------------------------------------|
| ICD-10 | RTI     | J15.4 | Pneumonia due to other streptococci                                          |
| ICD-10 | RTI     | J15.5 | Pneumonia due to Escherichia coli                                            |
| ICD-10 | RTI     | J15.6 | Pneumonia due to other aerobic Gram-negative bacteria                        |
| ICD-10 | RTI     | J15.7 | Pneumonia due to Mycoplasma pneumoniae                                       |
| ICD-10 | RTI     | J15.8 | Other bacterial pneumonia                                                    |
| ICD-10 | RTI     | J15.9 | Bacterial pneumonia, unspecified                                             |
| ICD-10 | RTI     | J16   | Pneumonia due to other infectious organisms, not elsewhere classified        |
| ICD-10 | RTI     | J16.0 | Chlamydial pneumonia                                                         |
| ICD-10 | RTI     | J16.8 | Pneumonia due to other specified infectious organisms                        |
| ICD-10 | RTI     | J17   | Pneumonia in diseases classified elsewhere                                   |
| ICD-10 | RTI     | J17.0 | Pneumonia in bacterial diseases classified elsewhere                         |
| ICD-10 | RTI     | J17.1 | Pneumonia in viral diseases classified elsewhere                             |
| ICD-10 | RTI     | J17.2 | Pneumonia in mycoses                                                         |
| ICD-10 | RTI     | J17.3 | Pneumonia in parasitic diseases                                              |
| ICD-10 | RTI     | J17.8 | Pneumonia in other diseases classified elsewhere                             |
| ICD-10 | RTI     | J18   | Pneumonia, organism unspecified                                              |
| ICD-10 | RTI     | J18.0 | Bronchopneumonia, unspecified                                                |
| ICD-10 | RTI     | J18.1 | Lobar pneumonia, unspecified                                                 |
| ICD-10 | RTI     | J18.2 | Hypostatic pneumonia, unspecified                                            |
| ICD-10 | RTI     | J18.8 | Other pneumonia, organism unspecified                                        |
| ICD-10 | RTI     | J18.9 | Pneumonia, unspecified                                                       |
| ICD-10 | RTI     | J20   | Acute bronchitis                                                             |
| ICD-10 | RTI     | J20.0 | Acute bronchitis due to Mycoplasma pneumoniae                                |
| ICD-10 | RTI     | J20.1 | Acute bronchitis due to Haemophilus influenzae                               |
| ICD-10 | RTI     | J20.2 | Acute bronchitis due to streptococcus                                        |
| ICD-10 | RTI     | J20.3 | Acute bronchitis due to coxsackievirus                                       |
| ICD-10 | RTI     | J20.4 | Acute bronchitis due to parainfluenza virus                                  |
| ICD-10 | RTI     | J20.5 | Acute bronchitis due to respiratory syncytial virus                          |
| ICD-10 | RTI     | J20.6 | Acute bronchitis due to rhinovirus                                           |
| ICD-10 | RTI     | J20.7 | Acute bronchitis due to echovirus                                            |
| ICD-10 | RTI     | J20.8 | Acute bronchitis due to other specified organisms                            |
| ICD-10 | RTI     | J20.9 | Acute bronchitis, unspecified                                                |
| ICD-10 | RTI     | J21   | Acute bronchiolitis                                                          |
| ICD-10 | RTI     | J21.0 | Acute bronchiolitis due to respiratory syncytial virus                       |
| ICD-10 | RTI     | J21.1 | Acute bronchiolitis due to human metapneumovirus                             |
| ICD-10 | RTI     | J21.8 | Acute bronchiolitis due to other specified organisms                         |
| ICD-10 | RTI     | J21.9 | Acute bronchiolitis, unspecified                                             |
| ICD-10 | RTI     | J22   | Unspecified acute lower respiratory infection                                |
| ICD-10 | RTI     | J40   | Bronchitis, not specified as acute or chronic                                |
| ICD-10 | RTI     | J44.0 | Chronic obstructive pulmonary disease with acute lower respiratory infection |
| ICD-10 | RTI     | J44.1 | Chronic obstructive pulmonary disease with acute exacerbation, unspecified   |
| ICD-10 | RTI     | J85   | Abscess of lung and mediastinum                                              |
| ICD-10 | RTI     | J85.0 | Gangrene and necrosis of lung                                                |

| Type   | Outcome | Code  | Description                                                               |
|--------|---------|-------|---------------------------------------------------------------------------|
| ICD-10 | RTI     | J85.1 | Abscess of lung with pneumonia                                            |
| ICD-10 | RTI     | J85.2 | Abscess of lung without pneumonia                                         |
| ICD-10 | RTI     | J85.3 | Abscess of mediastinum                                                    |
| ICD-10 | RTI     | J86   | Pyothorax                                                                 |
| ICD-10 | RTI     | J86.0 | Pyothorax with fistula                                                    |
| ICD-10 | RTI     | J86.9 | Pyothorax without fistula                                                 |
| OPCS-4 | CVE     | K401  | Saphenous vein graft replacement of one coronary artery                   |
| OPCS-4 | CVE     | K402  | Saphenous vein graft replacement of two coronary arteries                 |
| OPCS-4 | CVE     | K403  | Saphenous vein graft replacement of three coronary arteries               |
| OPCS-4 | CVE     | K404  | Saphenous vein graft replacement of four or more coronary arteries        |
| OPCS-4 | CVE     | K408  | Other specified saphenous vein graft replacement of coronary artery       |
| OPCS-4 | CVE     | K409  | Unspecified saphenous vein graft replacement of coronary artery           |
| OPCS-4 | CVE     | K411  | Autograft replacement of one coronary artery NEC                          |
| OPCS-4 | CVE     | K412  | Autograft replacement of two coronary arteries NEC                        |
| OPCS-4 | CVE     | K413  | Autograft replacement of three coronary arteries NEC                      |
| OPCS-4 | CVE     | K414  | Autograft replacement of four or more coronary arteries NEC               |
| OPCS-4 | CVE     | K418  | Other specified other autograft replacement of coronary artery            |
| OPCS-4 | CVE     | K419  | Unspecified other autograft replacement of coronary artery                |
| OPCS-4 | CVE     | K421  | Allograft replacement of one coronary artery                              |
| OPCS-4 | CVE     | K422  | Allograft replacement of two coronary arteries                            |
| OPCS-4 | CVE     | K423  | Allograft replacement of three coronary arteries                          |
| OPCS-4 | CVE     | K424  | Allograft replacement of four or more coronary arteries                   |
| OPCS-4 | CVE     | K428  | Other specified allograft replacement of coronary artery                  |
| OPCS-4 | CVE     | K429  | Unspecified allograft replacement of coronary artery                      |
| OPCS-4 | CVE     | K431  | Prosthetic replacement of one coronary artery                             |
| OPCS-4 | CVE     | K432  | Prosthetic replacement of two coronary arteries                           |
| OPCS-4 | CVE     | K433  | Prosthetic replacement of three coronary arteries                         |
| OPCS-4 | CVE     | K434  | Prosthetic replacement of four or more coronary arteries                  |
| OPCS-4 | CVE     | K438  | Other specified prosthetic replacement of coronary artery                 |
| OPCS-4 | CVE     | K439  | Unspecified prosthetic replacement of coronary artery                     |
| OPCS-4 | CVE     | K441  | Replacement of coronary arteries using multiple methods                   |
| OPCS-4 | CVE     | K442  | Revision of replacement of coronary artery                                |
| OPCS-4 | CVE     | K448  | Other specified other replacement of coronary artery                      |
| OPCS-4 | CVE     | K449  | Unspecified other replacement of coronary artery                          |
| OPCS-4 | CVE     | K451  | Double anastomosis of mammary arteries to coronary arteries               |
| OPCS-4 | CVE     | K452  | Double anastomosis of thoracic arteries to coronary arteries NEC          |
| OPCS-4 | CVE     | K453  | Anastomosis of mammary artery to left anterior descending coronary artery |
| OPCS-4 | CVE     | K454  | Anastomosis of mammary artery to coronary artery NEC                      |
| OPCS-4 | CVE     | K455  | Anastomosis of thoracic artery to coronary artery NEC                     |
| OPCS-4 | CVE     | K456  | Revision of connection of thoracic artery to coronary artery              |
| OPCS-4 | CVE     | K458  | Other specified connection of thoracic artery to coronary artery          |
| OPCS-4 | CVE     | K459  | Unspecified connection of thoracic artery to coronary artery              |
| OPCS-4 | CVE     | K461  | Double implantation of mammary arteries into heart                        |

| Type   | Outcome | Code  | Description                                                                                                    |
|--------|---------|-------|----------------------------------------------------------------------------------------------------------------|
| OPCS-4 | CVE     | K462  | Double implantation of thoracic arteries into heart NEC                                                        |
| OPCS-4 | CVE     | K463  | Implantation of mammary artery into heart NEC                                                                  |
| OPCS-4 | CVE     | K464  | Implantation of thoracic artery into heart NEC                                                                 |
| OPCS-4 | CVE     | K465  | Revision of implantation of thoracic artery into heart                                                         |
| OPCS-4 | CVE     | K468  | Other specified other bypass of coronary artery                                                                |
| OPCS-4 | CVE     | K469  | Unspecified other bypass of coronary artery                                                                    |
| OPCS-4 | CVE     | K491  | Percutaneous transluminal balloon angioplasty of one coronary artery                                           |
| OPCS-4 | CVE     | K492  | Percutaneous transluminal balloon angioplasty of multiple coronary arteries                                    |
| OPCS-4 | CVE     | K493  | Percutaneous transluminal balloon angioplasty of bypass graft of coronary artery                               |
| OPCS-4 | CVE     | K494  | Percutaneous transluminal cutting balloon angioplasty of coronary artery                                       |
| OPCS-4 | CVE     | K498  | Other specified transluminal balloon angioplasty of coronary artery                                            |
| OPCS-4 | CVE     | K499  | Unspecified transluminal balloon angioplasty of coronary artery                                                |
| OPCS-4 | CVE     | K501  | Percutaneous transluminal laser coronary angioplasty                                                           |
| OPCS-4 | CVE     | K502  | Percutaneous transluminal coronary thrombolysis using streptokinase                                            |
| OPCS-4 | CVE     | K503  | Percutaneous transluminal injection of therapeutic substance into coronary artery NEC                          |
| OPCS-4 | CVE     | K504  | Percutaneous transluminal atherectomy of coronary artery                                                       |
| OPCS-4 | CVE     | K508  | Other specified other therapeutic transluminal operations on coronary artery                                   |
| OPCS-4 | CVE     | K509  | Unspecified other therapeutic transluminal operations on coronary artery                                       |
| OPCS-4 | CVE     | K511  | Percutaneous transluminal angioscopy                                                                           |
| OPCS-4 | CVE     | K512  | Intravascular ultrasound of coronary artery                                                                    |
| OPCS-4 | CVE     | K518  | Other specified diagnostic transluminal operations on coronary artery                                          |
| OPCS-4 | CVE     | K519  | Unspecified diagnostic transluminal operations on coronary artery                                              |
| ICD-10 | CVE     | I21   | Acute myocardial infarction                                                                                    |
| ICD-10 | CVE     | I21.0 | Acute transmural myocardial infarction of anterior wall                                                        |
| ICD-10 | CVE     | I21.1 | Acute transmural myocardial infarction of inferior wall                                                        |
| ICD-10 | CVE     | I21.2 | Acute transmural myocardial infarction of other sites                                                          |
| ICD-10 | CVE     | I21.3 | Acute transmural myocardial infarction of unspecified site                                                     |
| ICD-10 | CVE     | I21.4 | Acute subendocardial myocardial infarction                                                                     |
| ICD-10 | CVE     | I21.9 | Acute myocardial infarction, unspecified                                                                       |
| ICD-10 | CVE     | I22   | Subsequent myocardial infarction                                                                               |
| ICD-10 | CVE     | I22.0 | Subsequent myocardial infarction of anterior wall                                                              |
| ICD-10 | CVE     | I22.1 | Subsequent myocardial infarction of inferior wall                                                              |
| ICD-10 | CVE     | I22.8 | Subsequent myocardial infarction of other sites                                                                |
| ICD-10 | CVE     | I22.9 | Subsequent myocardial infarction of unspecified site                                                           |
| ICD-10 | CVE     | I23   | Certain current complications following acute myocardial infarction                                            |
| ICD-10 | CVE     | I23.0 | Haemopericardium as current complication following acute myocardial infarction                                 |
| ICD-10 | CVE     | I23.1 | Atrial septal defect as current complication following acute myocardial infarction                             |
| ICD-10 | CVE     | I23.2 | Ventricular septal defect as current complication following acute myocardial infarction                        |
| ICD-10 | CVE     | I23.3 | Rupture of cardiac wall without haemopericardium as current complication following acute myocardial infarction |
| ICD-10 | CVE     | I23.4 | Rupture of chordae tendineae as current complication following acute                                           |

| Type   | Outcome | Code  | Description                                                                                                             |
|--------|---------|-------|-------------------------------------------------------------------------------------------------------------------------|
|        |         |       | myocardial infarction                                                                                                   |
| ICD-10 | CVE     | I23.5 | Rupture of papillary muscle as current complication following acute myocardial infarction                               |
| ICD-10 | CVE     | I23.6 | Thrombosis of atrium, auricular appendage, and ventricle as current complications following acute myocardial infarction |
| ICD-10 | CVE     | I23.8 | Other current complications following acute myocardial infarction                                                       |
| ICD-10 | CVE     | I63   | Cerebral infarction                                                                                                     |
| ICD-10 | CVE     | I63.0 | Cerebral infarction due to thrombosis of precerebral arteries                                                           |
| ICD-10 | CVE     | I63.1 | Cerebral infarction due to embolism of precerebral arteries                                                             |
| ICD-10 | CVE     | I63.2 | Cerebral infarction due to unspecified occlusion or stenosis of precerebral arteries                                    |
| ICD-10 | CVE     | I63.3 | Cerebral infarction due to thrombosis of cerebral arteries                                                              |
| ICD-10 | CVE     | I63.4 | Cerebral infarction due to embolism of cerebral arteries                                                                |
| ICD-10 | CVE     | I63.5 | Cerebral infarction due to unspecified occlusion or stenosis of cerebral arteries                                       |
| ICD-10 | CVE     | I63.6 | Cerebral infarction due to cerebral venous thrombosis, nonpyogenic                                                      |
| ICD-10 | CVE     | I63.8 | Other cerebral infarction                                                                                               |
| ICD-10 | CVE     | I63.9 | Cerebral infarction, unspecified                                                                                        |
| ICD-10 | CVE     | I64   | Stroke, not specified as haemorrhage or infarction                                                                      |
| ICD-10 | CVE     | I64.0 | Stroke, not specified as haemorrhage or infarction                                                                      |
