# Supplementary material for: Risks of smoking and benefits of smoking cessation on hospitalisations for cardiovascular events and respiratory infection in patients with rheumatoid arthritis: a retrospective cohort study using the Clinical Practice Research Datalink
Source: PubMed Central journal article supplement (PMC5623338; doi:10.1136/rmdopen-2017-000506), 2017-09-26
Supplement: rmdopen-2017-000506supp003.pdf [file rmdopen-2017-000506supp003.pdf]

## Supplementary Figure S2: Infection time at risk

Definition of time at risk when examining recurrent events

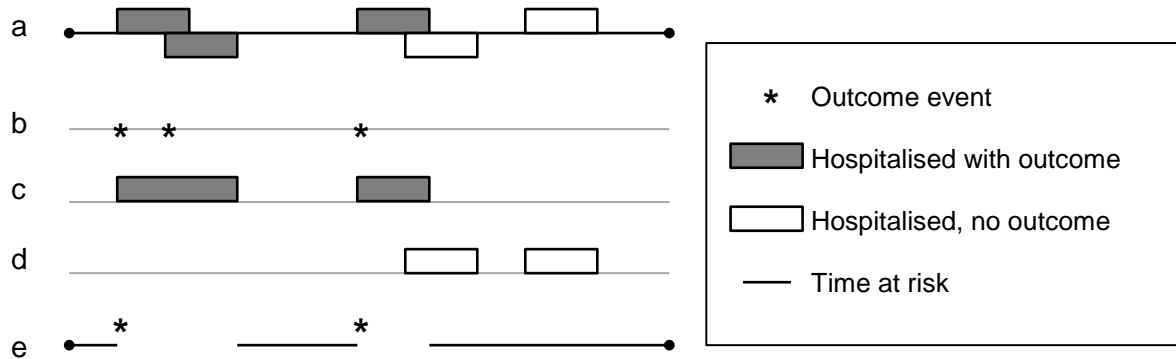

- Represents a patient's follow-up, showing all hospitalisation spells
- Timing of outcome events
- Time spent in hospital with an outcome recorded
- Time spent in hospital without an outcome recorded
- Time at risk and outcomes captured. Time at risk excludes time in hospital when an outcome has already been recorded (cannot have more than one outcome per hospitalisation).
